# Supplementary material for: Compositional Variation of PCBs, PAHs, and OCPs at Gas Phase and Size Segregated Particle Phase during Dust Incursion from the Saharan Desert in the Northwestern Anatolian Peninsula
Source: Hindawi journal article supplement (doi:10.1155/2016/7153286), 2016-01-01
Supplement: f1 [file 7153286.f1.pdf]

Supplementary Material Table 1. Congener specific PCB congener concentrations ( $\text{pg}\cdot\text{m}^{-3}$ )

|               | February 1 |      | February 2 |      | February 3 |      |
|---------------|------------|------|------------|------|------------|------|
|               | Particle   | Gas  | Particle   | Gas  | Particle   | Gas  |
| PCB# 4-10     | 6.2        | 14.6 | n.d.       | 15.6 | n.d.       | n.d. |
| PCB# 7-9      | n.d.       | 12.1 | n.d.       | 2.3  | n.d.       | 5.0  |
| PCB# 6        | 2.1        | 11.2 | 1.5        | 6.0  | 0.2        | 6.1  |
| PCB# 8-5      | n.d.       | n.d. | n.d.       | 2.0  | n.d.       | 8.5  |
| PCB# 19       | n.d.       | n.d. | n.d.       | n.d. | n.d.       | n.d. |
| PCB# 13-12    | n.d.       | n.d. | n.d.       | n.d. | n.d.       | n.d. |
| PCB# 18       | 4.7        | 83.1 | 3.3        | 52.7 | n.d.       | 33.6 |
| PCB# 17-15    | n.d.       | n.d. | n.d.       | n.d. | n.d.       | n.d. |
| PCB# 16-32    | 3.4        | 6.0  | 0.1        | 1.4  | 2.1        | 0.7  |
| PCB# 26       | n.d.       | n.d. | n.d.       | n.d. | n.d.       | n.d. |
| PCB# 31       | 12.2       | 16.3 | n.d.       | 1.6  | n.d.       | 2.7  |
| PCB# 28       | 7.5        | 5.9  | n.d.       | 1.9  | 0.1        | 10.3 |
| PCB# 33-53    | 3.7        | 9.5  | n.d.       | 0.8  | n.d.       | 0.5  |
| PCB# 22       | 4.6        | 12.7 | 0.6        | 1.2  | n.d.       | 2.6  |
| PCB# 45       | 3.1        | 3.2  | n.d.       | 6.7  | n.d.       | 8.1  |
| PCB# 52       | 2.8        | n.d. | 0.2        | 6.6  | 0.3        | 6.4  |
| PCB# 47       | n.d.       | 17.1 | n.d.       | 5.1  | n.d.       | 6.7  |
| PCB# 48-49    | 6.5        | 3.9  | n.d.       | 8.6  | n.d.       | 6.5  |
| PCB# 44       | n.d.       | 1.6  | n.d.       | 0.4  | n.d.       | n.d. |
| PCB# 37-42    | 1.7        | 32.0 | 0.4        | 3.4  | 1.6        | 5.8  |
| PCB# 71-41-64 | n.d.       | n.d. | 0.1        | 0.1  | n.d.       | n.d. |
| PCB# 100      | n.d.       | 9.0  | n.d.       | 9.7  | 0.4        | 20.2 |
| PCB# 74       | n.d.       | n.d. | n.d.       | n.d. | n.d.       | n.d. |
| PCB# 76-61    | n.d.       | 1.9  | n.d.       | n.d. | 0.0        | 2.2  |
| PCB# 66-95    | 4.2        | 10.0 | 0.4        | 2.0  | 0.9        | 2.9  |
| PCB# 91       | n.d.       | n.d. | n.d.       | n.d. | n.d.       | n.d. |
| PCB# 56-60-92 | 0.7        | 16.8 | 0.2        | 0.6  | n.d.       | 0.3  |
| PCB# 84       | 0.9        | 12.8 | 0.2        | 0.4  | 0.2        | 0.5  |
| PCB# 101-89   | 2.2        | 4.0  | 0.5        | 3.5  | 1.1        | 3.8  |
| PCB# 99       | n.d.       | n.d. | 0.1        | n.d. | n.d.       | n.d. |
| PCB# 119      | n.d.       | n.d. | 0.6        | n.d. | 2.4        | n.d. |
| PCB# 83       | 4.9        | n.d. | 0.9        | 0.7  | 1.1        | 0.2  |
| PCB# 97       | 2.4        | 1.9  | 0.2        | n.d. | 0.6        | n.d. |
| PCB# 87-81    | 2.5        | 26.1 | n.d.       | 6.5  | 1.2        | 11.8 |
| PCB# 85       | 3.3        | 1.7  | 0.2        | 0.5  | 0.6        | 0.4  |
| PCB# 77-110   | 0.7        | 0.4  | 0.1        | n.d. | 0.0        | 1.1  |
| PCB# 144-135  | n.d.       | 0.4  | n.d.       | 0.1  | 0.1        | 0.2  |
| PCB# 114-149  | n.d.       | 0.5  | n.d.       | 0.3  | n.d.       | 0.5  |
| PCB# 118      | n.d.       | n.d. | n.d.       | n.d. | n.d.       | n.d. |
| PCB# 123      | 0.5        | n.d. | n.d.       | 0.0  | n.d.       | 0.4  |
| PCB# 131      | n.d.       | 1.2  | 0.1        | 0.6  | 0.5        | 0.7  |
| PCB# 153      | 2.3        | 7.6  | 0.1        | 0.1  | 0.3        | 1.2  |
| PCB# 132-105  | 0.2        | 0.4  | 0.1        | 0.3  | 0.4        | 0.6  |
| PCB# 163-138  | n.d.       | n.d. | n.d.       | 1.2  | 9.2        | 0.4  |
| PCB# 126      | 0.2        | 0.6  | n.d.       | 0.1  | 0.2        | 0.2  |
| PCB# 167-128  | 2.1        | n.d. | n.d.       | n.d. | 0.9        | 1.6  |

|                  |      |      |      |      |      |      |
|------------------|------|------|------|------|------|------|
| PCB# 174         | n.d. | n.d. | n.d. | n.d. | n.d. | n.d. |
| PCB# 202-171-156 | n.d. | n.d. | n.d. | n.d. | n.d. | n.d. |
| PCB# 172         | n.d. | n.d. | n.d. | 0.0  | n.d. | 0.2  |
| PCB# 180         | 2.0  | 5.1  | n.d. | n.d. | n.d. | 0.1  |
| PCB# 200         | 3.2  | n.d. | n.d. | 0.2  | 1.3  | 0.4  |
| PCB# 169         | n.d. | n.d. | n.d. | n.d. | n.d. | n.d. |
| PCB# 170-190     | 2.0  | 31.7 | n.d. | 7.4  | 0.8  | 2.4  |
| PCB# 199         | 1.5  | 4.4  | n.d. | 1.2  | n.d. | 0.2  |
| PCB# 207         | 2.0  | 4.1  | 0.4  | 0.7  | 1.1  | 1.7  |
| PCB# 194         | 0.4  | 3.8  | 0.9  | 0.2  | 3.2  | 1.2  |
| PCB# 205         | 4.5  | 2.7  | 0.9  | 0.1  | n.d. | 0.8  |
| PCB# 206         | n.d. | n.d. | 0.3  | n.d. | 3.7  | n.d. |
